# Supplementary material for: Sex Differences of Uncinate Fasciculus Structural Connectivity in Individuals with Conduct Disorder
Source: PubMed Central journal article supplement (PMC4009134; doi:10.1155/2014/673165), 2014-04-14
Supplement: 673165.f1.pdf [file 673165.f1.pdf]

Supplement

Table 1. Demographic and clinical characteristics of the four subgroups (Mean  $\pm$  S.D.).

|                                   | Conduct Disorder            |                             | Healthy Control  |                            |
|-----------------------------------|-----------------------------|-----------------------------|------------------|----------------------------|
|                                   | Male<br>(n = 14)            | Female<br>(n = 13)          | Male<br>(n = 16) | Female<br>(n = 13)         |
| Age                               | 14.3 $\pm$ 0.7              | 13.9 $\pm$ 0.8              | 14.6 $\pm$ 0.7   | 14.2 $\pm$ 0.6             |
| IQ                                | 103 $\pm$ 12                | 105 $\pm$ 10                | 107 $\pm$ 6      | 105 $\pm$ 7                |
| Conduct problems (SDQ)            | 4.5 $\pm$ 2.1 <sup>a</sup>  | 4.5 $\pm$ 1.6 <sup>b</sup>  | 2.6 $\pm$ 1.3    | 1.8 $\pm$ 0.8 <sup>c</sup> |
| Total problems (SDQ)              | 14.9 $\pm$ 6.2              | 18.9 $\pm$ 4.2 <sup>b</sup> | 12.3 $\pm$ 5.9   | 9.4 $\pm$ 3.4              |
| Impulsivity(APSD)                 | 4.6 $\pm$ 2.0 <sup>a</sup>  | 5.4 $\pm$ 1.9 <sup>b</sup>  | 2.9 $\pm$ 1.6    | 3.1 $\pm$ 1.5              |
| callous-unemotional traits (APSD) | 5.8 $\pm$ 2.7               | 5.8 $\pm$ 1.5 <sup>b</sup>  | 4.3 $\pm$ 1.0    | 3.3 $\pm$ 1.8              |
| Total score(APSD)                 | 15.1 $\pm$ 3.7 <sup>a</sup> | 17.1 $\pm$ 3.4 <sup>b</sup> | 10.0 $\pm$ 1.6   | 8.9 $\pm$ 2.3              |

Note: <sup>a</sup> group means differ significantly from the male healthy control group at  $p < 0.05$  after Bonferroni correction; <sup>b</sup> group means differ significantly from the female healthy control group at  $p < 0.05$  after Bonferroni correction; <sup>c</sup> group means differ significantly from the male healthy control group at  $p < 0.05$  after Bonferroni correction. SDQ = the Strength and Difficulties Questionnaire; APSD = the Antisocial Process Screening Device.
